# Supplementary material for: Synthesis of Hyperbranched Polyglycerol-Photosensitizer/TiO 2 Nanocomposite for the Photocatalytic Degradation of Methylene Blue
Source: Research Square preprint supplement (doi:10.21203/rs.3.rs-6927801/v1), 2025-07-01
Supplement: Supplementary file 1 [file 0664686b8b9ca1ed4f6a5825.docx]

**Supporting Information**

Synthesis of Hyperbranched Polyglycerol-Photosensitizer/TiO2 Nanocomposite for the Photocatalytic Degradation of Methylene Blue

Guang-Zhao Li 1,2*, Shengrong Zhou 1, Debin Tian 1, Chengqiang Yang 1, Gen Liu 1,2*, Wenyan Wang 1,2, Dong Fang 1, Jinyu Zhou 1, Rui Han 1,2

1 Key Laboratory of Materials and Surface Technology (Ministry of Education), School of Materials Science and Engineering, Xihua University, Chengdu 610039, China;

2 Engineering Research Center of Intelligent Air-Ground Integration Vehicle and Control (Xihua University), Ministry of Education, Chengdu 610039, China

**1. EXPERIMENTAL SECTION**

**1.1. Chemicals and materials**

Hemin chloride (C34H32ClN4O4Fe, ≥98.0%) was purchased from Jiuding Chemical (Shanghai) Technology Co., Ltd. Eosin Y (EY, C20H6Br4Na2O5, Biotechnology level) was purchased from Shanghai Macklin Biochemical Technology Co. Glycerol monoxide (C3H6O2, ≥96.0%) was purchased from Sigma-Aldrich (Shanghai) Trading Co., Ltd. Titanium butoxide (C16H36O4Ti, AR, ≥98.5%) was purchased from Chengdu KeLong Chemical Co., Ltd. Methylene blue (MB, C16H18ClN3S·3H2O, IND, ≥98.5%) was purchased from Chengdu KeLong Chemical Co., Ltd. Glacial acetic acid (CH3COOH, AR, ≥99.5%) was purchased from Chengdu KeLong Chemical Co., Ltd. Acetone (C3H6O, AR, ≥99.5%) was purchased from Chengdu KeLong Chemical Co., Ltd. N,N-Dimethylformamide (DMF, C3H7NO, AR, ≥99.5%) was purchased from Shanghai Titan Technology Co., Ltd. Anhydrous ethanol (C2H5OH, AR, ≥99.7%) was purchased from Shanghai Titan Technology Co., Ltd. Anhydrous methanol (CH3OH, AR, ≥99.7%) was purchased from Shanghai Titan Technology Co., Ltd. Hexane (C6H14, AR, ≥99.7%) was purchased from Shanghai Titan Technology Co., Ltd. Isopentanol (C5H11OH, SafeDry) was purchased from Shanghai Titan Technology Co., Ltd. Tetrahydrofuran (C4H8O, SafeDry) was purchased from Shanghai Titan Technology Co., Ltd. Tintrifluoromethanesulfonate (C2F6O6S2Sn, ≥98.0%) was purchased from Shanghai Titan Technology Co., Ltd. N,N-Dicyclohexylcarbodiimide (DCC, C13H22N2, 99%) was purchased from Shanghai Titan Technology Co., Ltd. 4-Dimethylaminopyridine (DMAP C7H10N2, 99%) was purchased from Shanghai Titan Technology Co., Ltd. Dry ice (CO2, ≥99.0%) was purchased from Chengdu Jin Yuan Dry Ice Co., Ltd. All chemical reagents are used as received.

**1.2. Sample preparation**

**1.2.1. Synthesis of TiO2**

10 mL of butyl titanate was added to 35 mL of absolute ethanol in a beaker. In a separate beaker, 4 mL of glacial acetic acid was mixed with a solution of 35 mL of absolute ethanol and 10 mL of deionized water. The glacial acetic acid solution was then gradually added to the butyl titanate solution under continuous stirring. The resulting mixture was stirred mechanically for 20 mi n and then heated at 50 °C for another 20 min. A gray gel was formed, which was collected and dried in an oven at 100 °C. Finally, the dried gel was calcined at 260 °C for 2 h to obtain TiO2 powder.


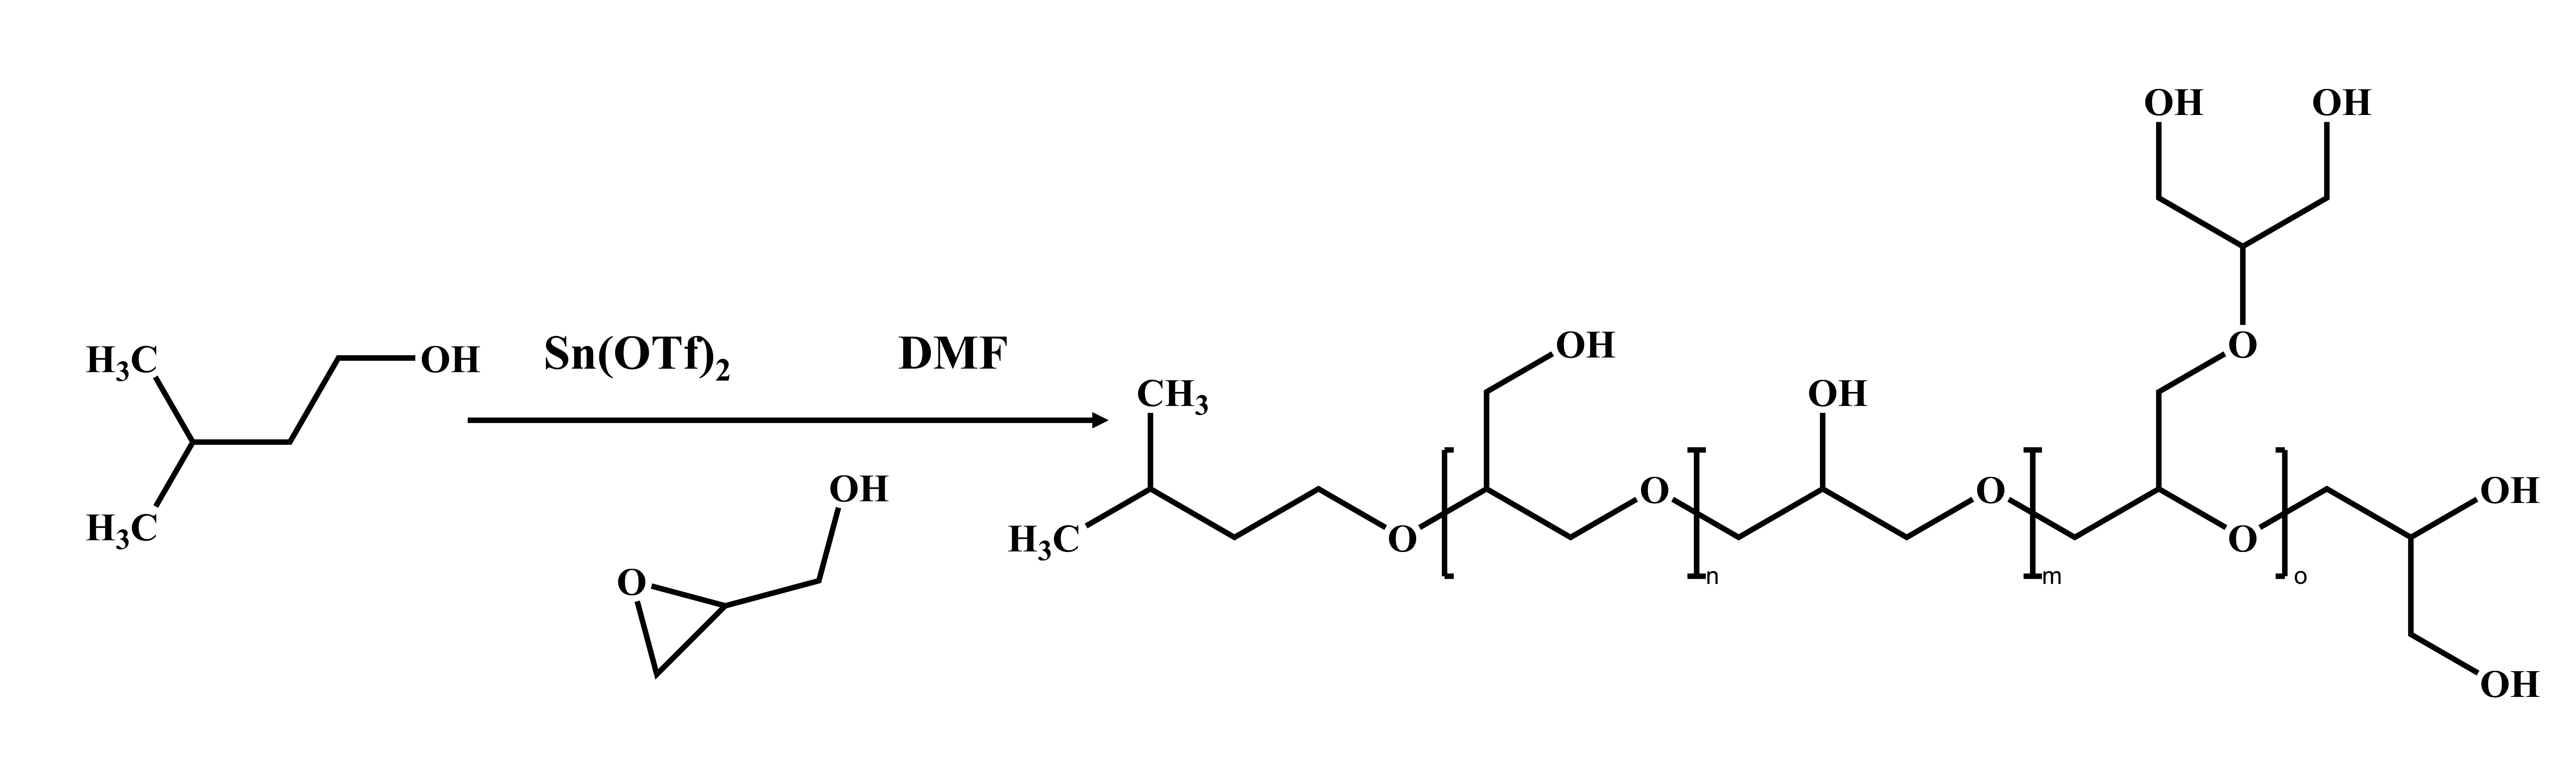


Scheme 1. Synthesis route of HPG.

**1.2.2. Synthesis of HPG with Different Degrees of Polymerization**

A solution of 0.2 mL isopentyl alcohol (3.33×10-4 mol) was mixed with 0.26 mL of tintrifluoromethanesulfonate (9.45×10-6 mol) in THF as the solvent. in a round bottom flask. The round-bottom was placed in a digital thermostatic magnetic stirrer containing a mixture of acetone and dry ice. The reaction was stirred at a constant reaction temperature (-78 °C) for 30 minutes and then 2.00 g of glycidyl monomer was added dropwise. Upon completion of the reaction, stirring was stopped and the polymer product was precipitated dropwise into hexane. It was then dried in an oven at 90 °C for 24 h to obtain HPG. The HPGs prepared from different volumes of isoamyl alcohol solution (0.2 mL, 0.16 mL, and 0.11 mL) were noted as HPG1, HPG2, and HPG3.

**1.2.3. Synthesis of HPG with Different Degrees of Branching**

The HPGs were prepared at different temperatures (acetone and dry ice solution, ice-water mixed solution, and constant temperature oil bath at 40 °C) and were recorded as HPG1, HPG4 and HPG5.


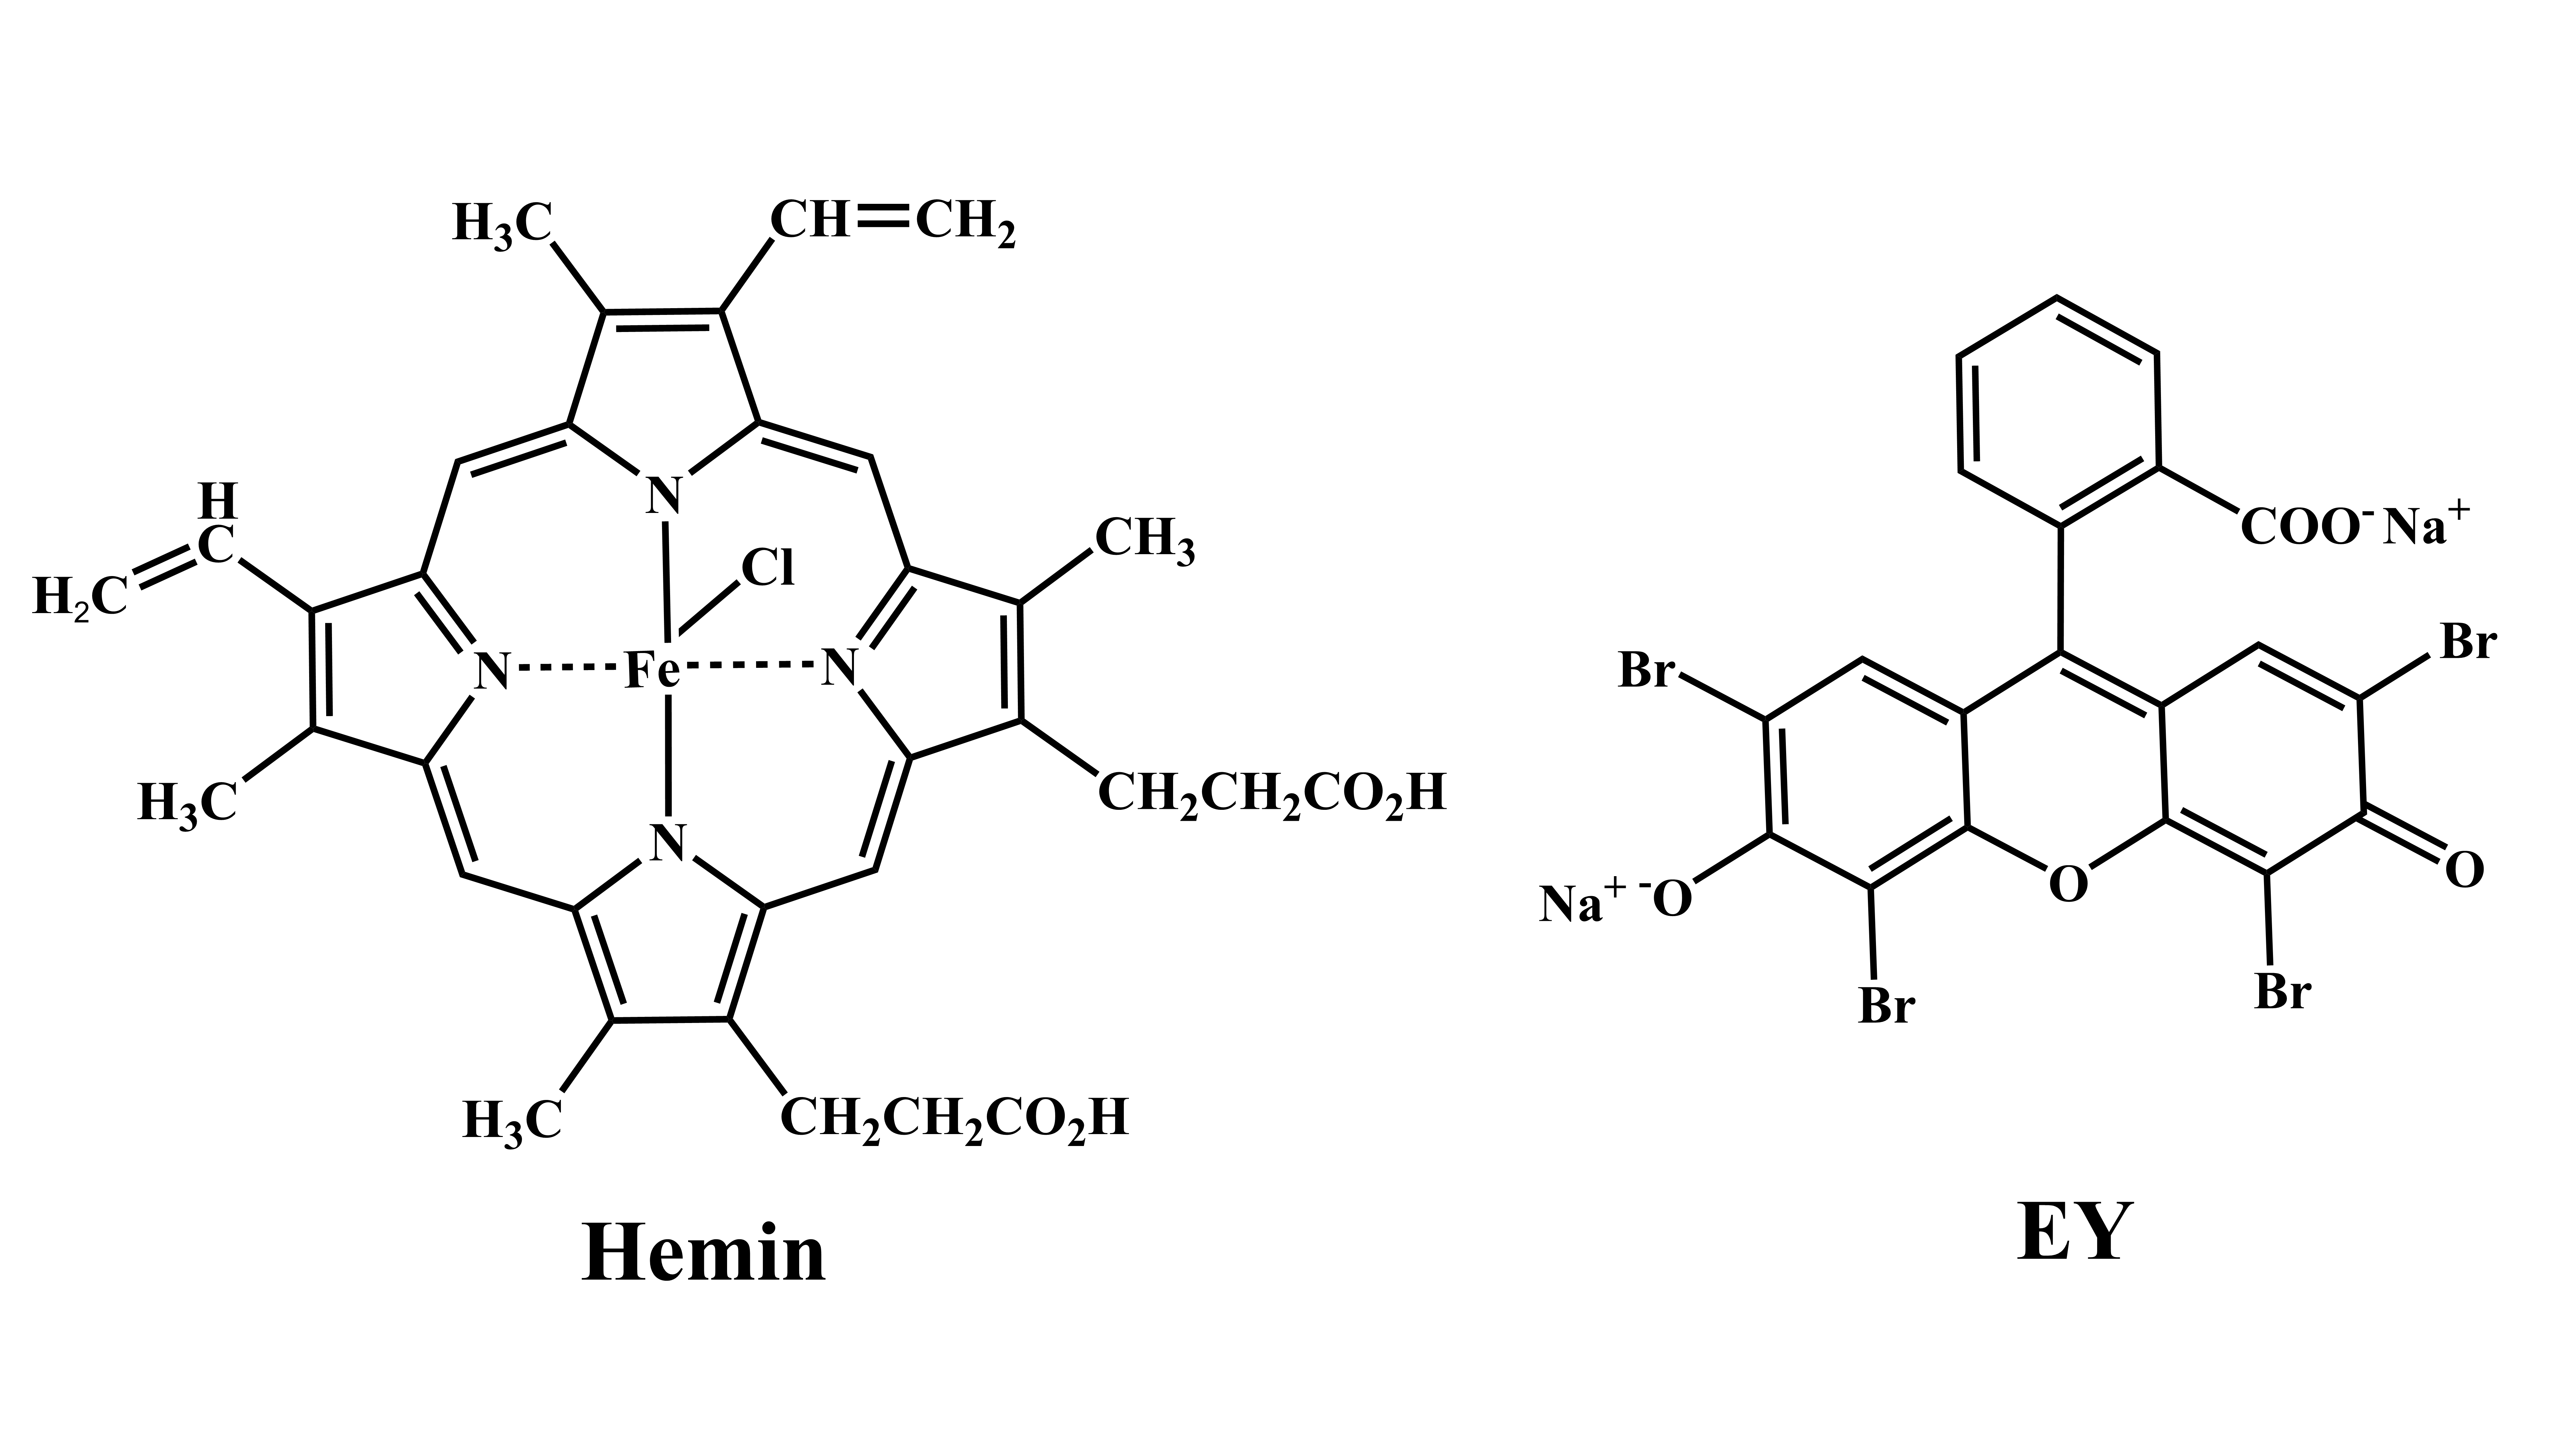


Scheme 2. The chemical structures of hemin and EY.

**1.2.4. Synthesis of HPG-hemin and HPG-EY**

The synthesis of HPG-hemin and HPG-EY followed a similar procedure. For HPG-hemin, 1 mg of hemin was dissolved in 2.5 mL DMF, and DCC and DMAP were added. For HPG-EY, 1 mg of EY was dissolved in 2.5 mL DMF, and phosphoric acid, DCC, and DMAP were added. In both cases, the mixtures were stirred under N2 at 0 °C for 30 min. Subsequently, 0.5 g of the corresponding HPG (e.g., HPG1 for HPG1-hemin or HPG1-EY) was dissolved in 2.5 mL DMF and added dropwise to the mixed solution. The reactions were stirred for 2 days. The products were first dissolved in methanol and then precipitated with acetone. Finally, the modified polymers were collected and dried under vacuum at 40 °C for 48 hours, yielding HPG1-hemin and HPG1-EY, respectively.

**1.2.5. Synthesis of HPG-hemin/TiO2**

A certain mass fraction of HPG1-hemin was mixed with TiO2 precursor solution. It was dispersed at room temperature for 30 min and compounded by the sol-gel method. The mixture was added dropwise to an ethanol solution containing butyl titanate and glacial acetic acid to form a homogeneous sol gel. Subsequently, the sol was hydrolyzed at 45 °C for 24 h and then dried at 105 °C to form a gel. Finally, the gel was heat-treated at 260°C for 2.5 hours. The final composite photocatalyst obtained was noted as HPG1-hemin/TiO2. The mass fractions of HPG1-hemin/TiO2 were varied as 0.1%, 0.5%, 1%, 2%, and 3%.

**1.2.6. Synthesis of HPG-EY/TiO2**

The preparation of HPG-EY/TiO2 was carried out basically the same as that of HPG-hemin/TiO2. The composite powders obtained by replacing HPG1-hemin with HPG1-EY was denoted as HPG1-EY/TiO2. The mass fractions of HPG1-EY/TiO2 were varied as 0.1%, 0.5%, 1%, 2%, and 3%.

**1.3. Photocatalytic Performance Testing**

The photocatalytic degradation efficiency of the prepared samples was evaluated using MB as a model pollutant. In each test, 60 mL of MB solution and 200 mg of photocatalyst were added to a 100 mL beaker. The mixture was stirred in the dark to establish adsorption equilibrium before exposure to light. During irradiation, 3-4 mL of the suspension was withdrawn at regular intervals and centrifuged, and 1 mL of the supernatant was analyzed to determine the MB concentration. The degradation efficiency under both UV and visible light was tested using the same procedure[1].

UV irradiation experiments were conducted using a Jiancai ZW30S19W (Shenzhen Anhongda Optoelectronics Technology Co., Ltd., Foshan, China) germicidal lamp (33 W) emitting at a wavelength of 253.7 nm. The lamp, with dimensions of 894.6 mm in length and 19 mm in diameter, was positioned 10 cm above the sample to ensure uniform illumination. For visible light irradiation, a Philips R7s (Philips Investment Co., Ltd., Shanghai, China) tungsten iodide lamp (500 W) was employed, providing a peak wavelength near 799.5 nm, with the same 10 cm distance maintained to the sample. The concentration of MB was monitored at 664 nm using UV-Vis spectrophotometry, and its adsorption and degradation efficiencies were calculated based on the Lambert-Beer law, as shown in Equation (1)[2, 3].

(1)

where *A* is the absorbance, *I0* is the initial light intensity, *I* is the transmitted light intensity, *T* is the transmittance, *ε* is the molar absorption coefficient, b is the solution thickness, and c is the MB concentration. Under fixed conditions, the solution concentration c is directly proportional to its absorbance A. The degradation efficiency η was calculated using Equation (2):

(2)

where *c0* and c represent the initial and remaining MB concentration, respectively, and *A0* and *A* denote the initial and resultant absorbance values, respectively.

**1.4. Characterizations**

**1.4.1. X-ray Diffraction (XRD)**

The XRD test was conducted using the DX-2700 X-ray diffractometer from Dandong Haoyuan Instrument Co., Ltd., with a stepwise scanning method and Cu Kα radiation (λ = 0.154 nm). The experimental parameters were set at a tube voltage of 40 kV, a tube current of 200 mA, a scanning angle ranging from 5° to 80°, and a scanning speed of 0.02 °/s.

**1.4.2. Field Emission Scanning Electron Microscopy (SEM)**

The SEM test was conducted using the SU8010 field emission scanning electron microscope from Hitachi, Japan. The test was performed with an acceleration voltage (HV) of 15 kV, a working distance (WD) of 10.5 mm, and an ETD probe type of secondary electron probe.

**1.4.3. 1H Nuclear Magnetic Resonance (1H-NMR)**

The 1H-NMR test was conducted using the AVANCENEO nuclear magnetic resonance spectrometer from Bruker Corporation. Deuterated methanol was used as the solvent, and TMS was employed as the internal standard.

**1.4.4. 13C Nuclear Magnetic Resonance (13C-NMR)**

The 13C-NMR testing conditions were kept consistent with the parameters and experimental procedures described in the 1H-NMR.

**1.4.5. Thermogravimetric Analysis (TGA)**

The TGA analysis was conducted using the TGA-550 thermogravimetric analyzer from TA Corporation in the United States. The characterization was performed in a nitrogen atmosphere.

**1.4.6. Gel Permeation Chromatography (GPC)**

The number average molecular weight (Mn) and molecular weight distribution (Mw/Mn) were measured in DMF by Waters1515 gel chromatograph at a flow rate of 1.00 mL min−1.

**1.4.7. Fourier Transform Infrared Spectroscopy (FT-IR)**

In this experiment, the FT-IR characterization was performed using the Nicolet 380 Fourier transform infrared spectrometer from Thermo Fisher Scientific, USA. The test was conducted using the KBr pellet method, with a wavenumber range of 400-4000 cm−1 and a scan number of 64.

**1.4.8. Raman Spectroscopy**

The Raman spectrometer used for Raman testing was the iHR320 Raman spectrometer from HORIBA Corporation in Japan. It was used with a 532 nm single longitudinal and transverse mode solid-state laser, which had a linewidth of 0.00001 nm and was in a TEM00 mode for characterization experiments.

**1.4.9. Ultraviolet-Visible Diffuse Reflectance (UV-Vis DRS)**

The UV Vis DRS test was conducted using a Lambda1050 UV-Vis-NIR spectrophotometer from PerkinElmer AG, with BaSO4 used as the reference sample. The powder was compressed and characterized within a range of 200-800 nm, with a slit width set at 2 nm and a resolution of 1 nm.

**2. SUPPLEMENTARY FIGURES**





**Figure S1.** The 1H NMR spectrum of (a) HPG1, (b) HPG2, (c) HPG3.





**Figure S2.** The 1H NMR spectrum of (a) HPG1, (b) HPG4, (c) HPG5.





**Figure S3.** The 13C NMR spectrum of (a) HPG1, (b) HPG4, (c) HPG5.





**Figure S4.** Adsorption rate data of composites with different polymer mass fractions. (a) HPG1-hemin/TiO2, (b) HPG2-hemin/TiO2, (c) HPG1-EY/TiO2, (d) HPG5-EY/TiO2.





**Figure S5.** UV photocatalytic data of control group samples(a) HPG1-EY/TiO2, (b) HPG5-EY/ TiO2, (c) HPG1-hemin/TiO2, (d) HPG2-hemin/ TiO2.

**3. SUPPLEMENTARY TABLES**

**Table S1. Degree of branching of HPG1、HPG4 and HPG5**

| Region | Shift (ppm) | HPG1 Peak integration | HPG4 Peak integration | HPG5 Peak integration |
| --- | --- | --- | --- | --- |
| L1,3 | 81.0-82.0 | 1 | 1 | 1 |
| D | 79.5-80.5 | 0.51 | 0.6 | 0.68 |
| 2L1,4 | 73.5-74.5 | 5.08 | 4.2 | 4.07 |
| 2D, 2T | 72-73.5 | 9.05 | 8.47 | 7.68 |
| L1,3, L1,4 | 70.5-72 | 0.85 | 3.20 | 3.15 |
| T | 63.0-65.0 | 3.53 | 2.26 | 2.10 |
| L1,3 | 62.0-63.5 | 3.14 | 3.15 | 2.88 |
| Degree of Branching |  | 0.15 | 0.19 | 0.27 |

**REFERENCES:**

1. Zhu Z, Zhou S, Tian D, et al (2025) Fabrication of Polydopamine/hemin/TiO2 Composites with Enhanced Visible Light Absorption for Efficient Photocatalytic Degradation of Methylene Blue. Polymers 17:311. https://doi.org/10.3390/polym17030311

2. Sonu, Sharma S, Dutta V, et al (2021) An overview of heterojunctioned ZnFe2O4 photocatalyst for enhanced oxidative water purification. Journal of Environmental Chemical Engineering 9:105812. https://doi.org/10.1016/j.jece.2021.105812

3. Jilani A, Melaibari AA (2022) MoS2-Cu/CuO@graphene Heterogeneous Photocatalysis for Enhanced Photocatalytic Degradation of MB from Water. Polymers 14:3259. https://doi.org/10.3390/polym14163259
