# Supplementary figures and images for: Synthesis of Hyperbranched Polyglycerol-Photosensitizer/TiO 2 Nanocomposite for the Photocatalytic Degradation of Methylene Blue
Source: Research Square preprint supplement (doi:10.21203/rs.3.rs-6927801/v1), 2025-07-01

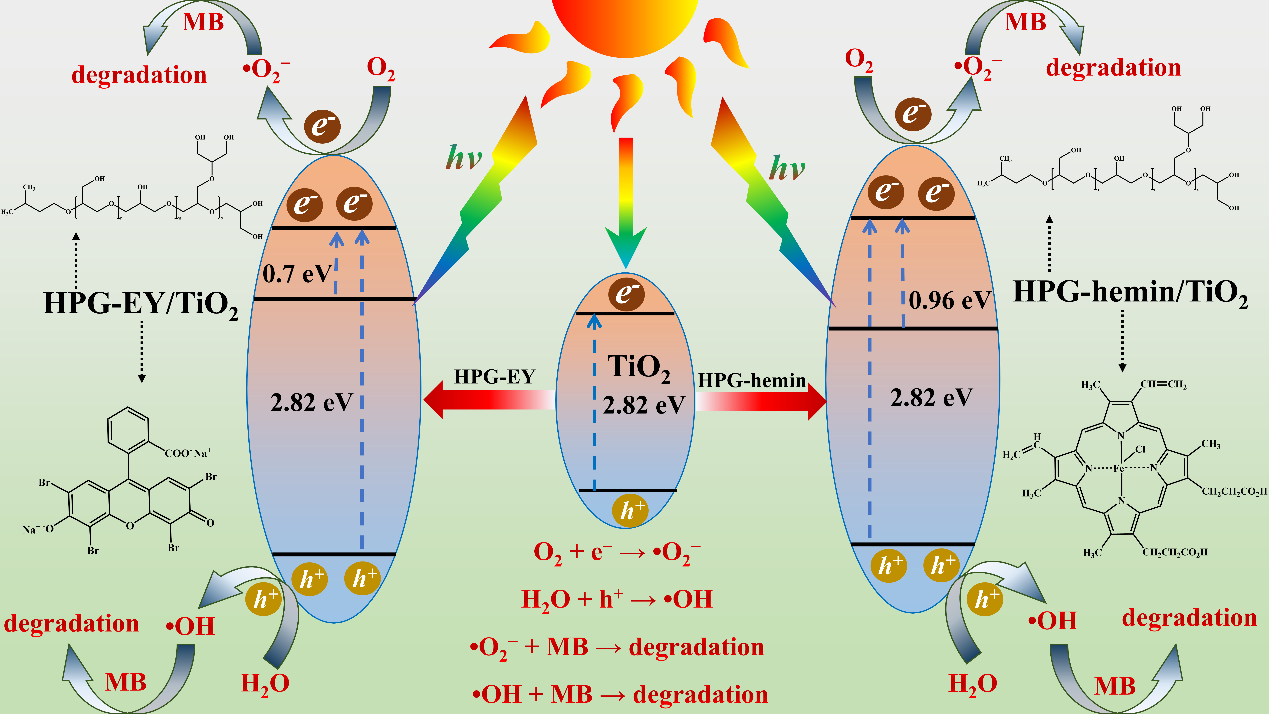


Graphic abstract

Supplement: Supplementary file 2 [file 17237a3f877eaf4eac9bf08a.docx]
